# Supplementary material for: Single and double chain surfactant–cobalt(iii) complexes: the impact of hydrophobicity on the interaction with calf thymus DNA, and their biological activities
Source: Royal Society of Chemistry journal article supplement (doi:10.1039/c5ra02763b), 2015-01-01
Supplement: c5ra02763b1.pdf [file c5ra02763b1.pdf]

## Single and double chain surfactant–cobalt(III) complexes: The impact of hydrophobicity on the interaction with calf thymus DNA, and their biological activities

*Selvakumar Veeralakshmi,<sup>a</sup> Selvan Nehru,<sup>a</sup> Gopal Sabapathi,<sup>a</sup> Sankaralingam*

*Arunachalam,<sup>\*a</sup> Ponnambalam Venuvanaligam,<sup>a</sup> Ponnuchamy Kumar,<sup>b</sup> Chidambaram Anusha,<sup>c</sup>*

*Vilwanathan Ravikumar<sup>c</sup>*

### Supporting Information

#### Figure contents

**Figure S1.** Benesi-Hildebrand plot of  $1/A_{\text{obs}} - A_0$  on the reciprocal of [surfactant–cobalt(III) complex] **1–4**

**Figure S2.** DLS measurements for the size distributions of DNA and DNA in the presence of surfactant–cobalt(III) complexes (**1–4**)

**Figure S3.** Ground state optimized molecular structures of complexes **1–4** calculated at B3LYB/LAN2DZ (Co)/6-31g(d,p) level.

#### Table contents

**Table S1.** Selected bond distances (Å) and angles (°) for optimized complexes **1–4** in the ground state geometry at B3LYB/LAN2DZ (Co)/6-31g (d,p) level.

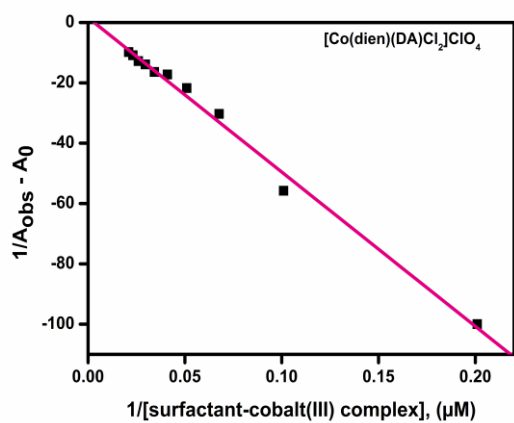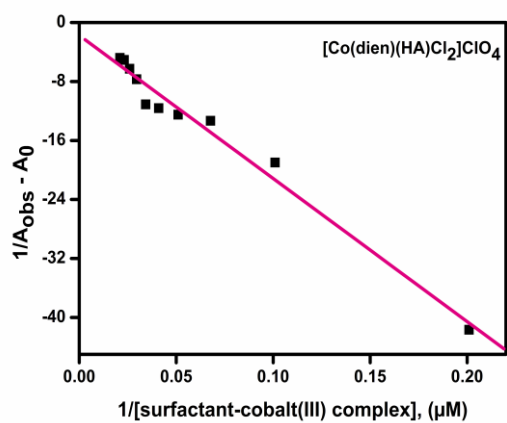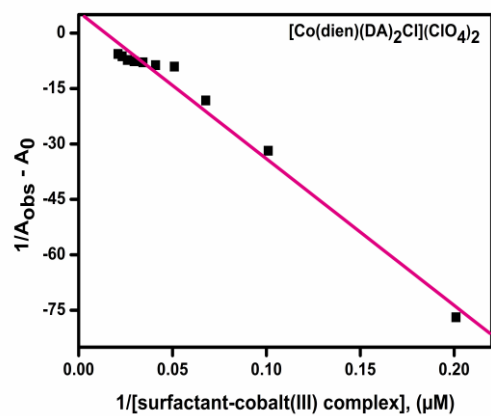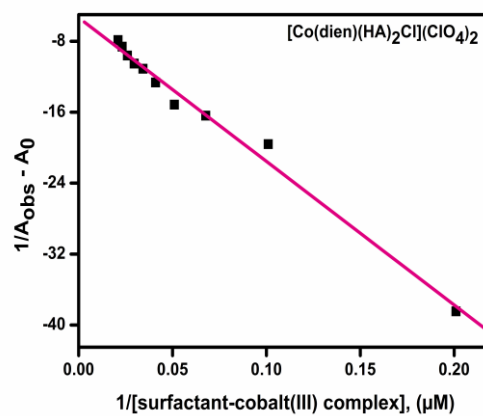

**Figure S1.** Benesi-Hildebrand plot of  $1/A_{\text{obs}} - A_0$  on the reciprocal of [surfactant–cobalt(III) complex] 1–4

## Results

|                                | Size (d.nm):         | % Intensity | Width (d.n... |
|--------------------------------|----------------------|-------------|---------------|
| <b>Z-Average (d.nm):</b> 436.3 | <b>Peak 1:</b> 354.1 | 100.0       | 91.77         |
| <b>Pdl:</b> 0.499              | <b>Peak 2:</b> 0.000 | 0.0         | 0.000         |
| <b>Intercept:</b> 0.998        | <b>Peak 3:</b> 0.000 | 0.0         | 0.000         |

**Result quality :** Refer to quality report

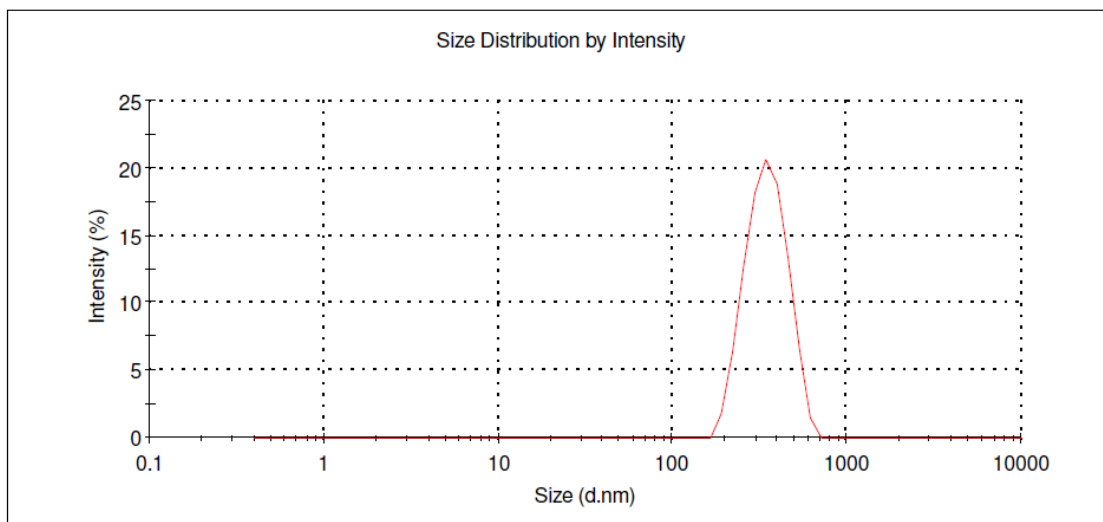

**Figure S2(a).** DLS measurements for the average hydrodynamic size distributions of DNA

## Results

|                                | Size (d.nm):         | % Intensity | Width (d.nm) |
|--------------------------------|----------------------|-------------|--------------|
| <b>Z-Average (d.nm):</b> 588.2 | <b>Peak 1:</b> 1322  | 75.3        | 715.3        |
| <b>Pdl:</b> 0.477              | <b>Peak 2:</b> 327.7 | 24.7        | 86.35        |
| <b>Intercept:</b> 1.01         | <b>Peak 3:</b> 0.000 | 0.0         | 0.000        |

**Result quality :** Refer to quality report

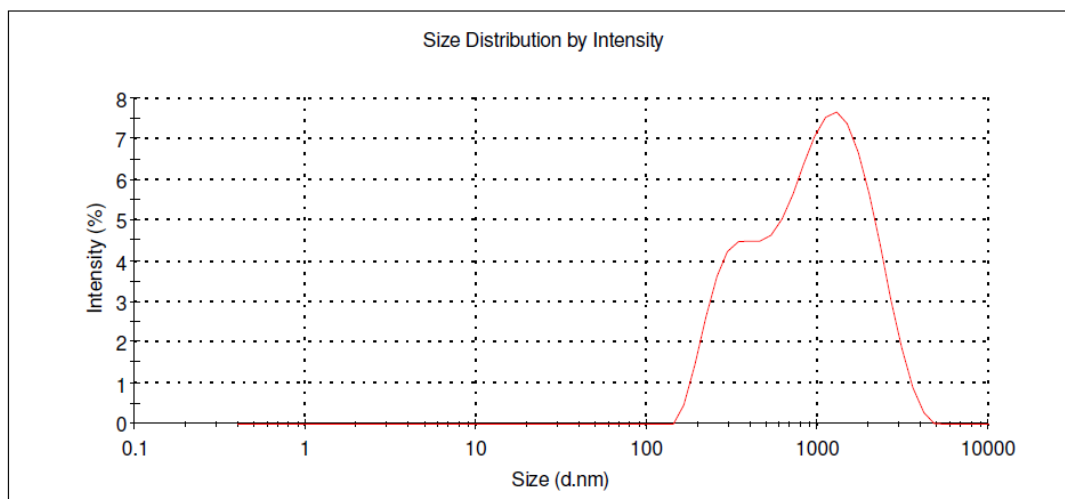

**Figure S2 (b).** DLS measurements for the average hydrodynamic size distributions of DNA+ complex 1

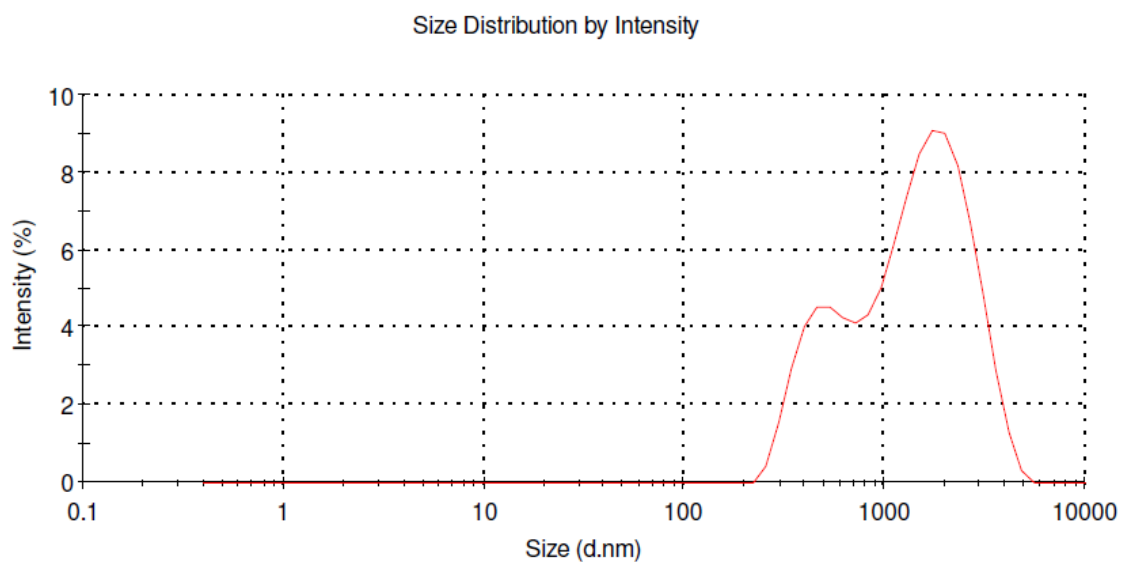

**Figure S2 (c).** DLS measurements for the average hydrodynamic size distributions of DNA+ complex 2

## Results

|                                | Size (d.nm):         | % Intensity | Width (d.n... |
|--------------------------------|----------------------|-------------|---------------|
| <b>Z-Average (d.nm):</b> 977.2 | <b>Peak 1:</b> 1833  | 74.6        | 825.7         |
| <b>Pdl:</b> 0.342              | <b>Peak 2:</b> 500.3 | 25.4        | 132.4         |
| <b>Intercept:</b> 0.946        | <b>Peak 3:</b> 0.000 | 0.0         | 0.000         |

**Result quality :** Good

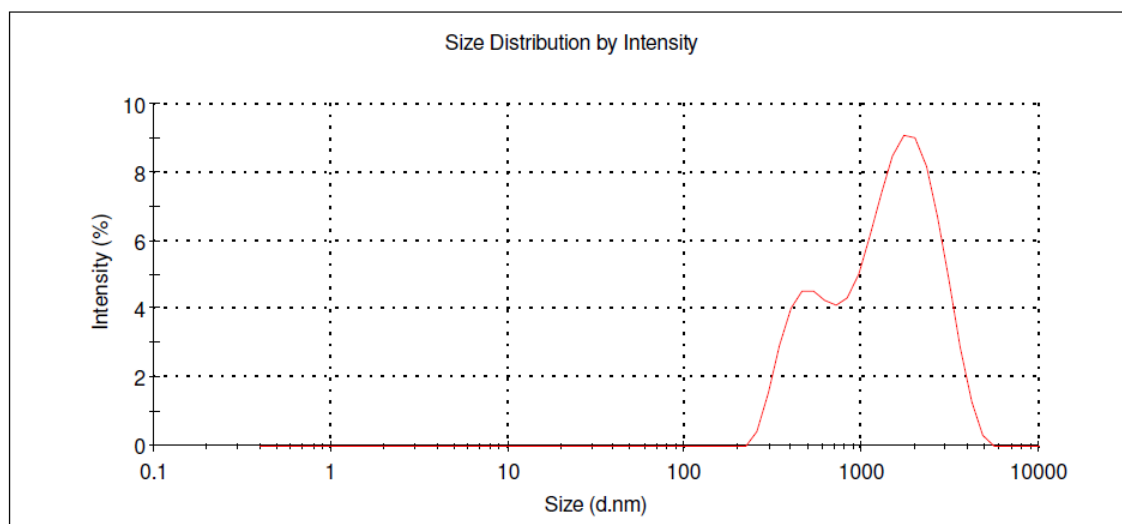

**Figure S2 (d).** DLS measurements for the average hydrodynamic size distributions of DNA+ complex 3

## Results

|                               | Size (d.nm):         | % Intensity | Width (d.nm) |
|-------------------------------|----------------------|-------------|--------------|
| <b>Z-Average (d.nm):</b> 1081 | <b>Peak 1:</b> 2257  | 79.6        | 1207         |
| <b>PdI:</b> 0.499             | <b>Peak 2:</b> 388.2 | 20.4        | 107.6        |
| <b>Intercept:</b> 0.946       | <b>Peak 3:</b> 0.000 | 0.0         | 0.000        |

**Result quality :** Refer to quality report

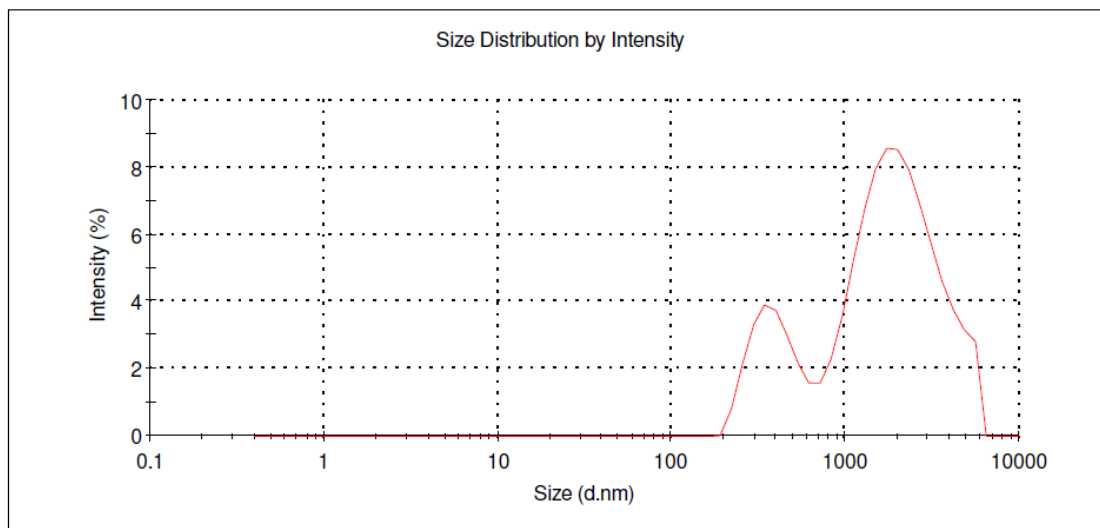

**Figure S2 (e).** DLS measurements for the average hydrodynamic size distributions of DNA+ complex 4

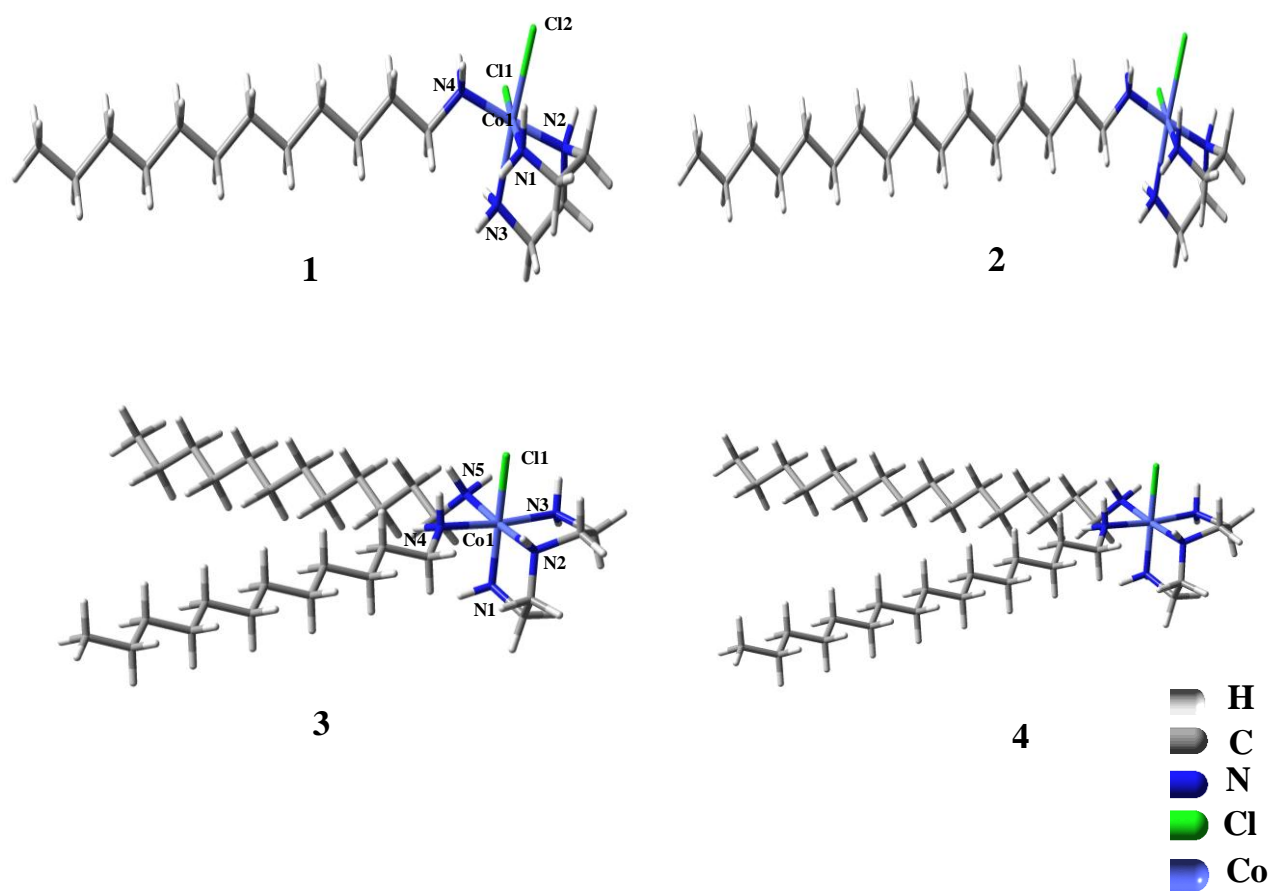

**Figure S2.** Ground state optimized molecular structures of complexes 1-4 calculated at B3LYB/LAN2DZ (Co)/6-31g(d,p) level.

**Table S1.** Selected bond distances (Å) and angles (°) for optimized complexes **1-4** in the ground state geometry at B3LYB/LAN2DZ (Co)/6-31g (d,p) level.

| <b>Bond Parameters</b> | <b>Complex 1</b> | <b>Complex 2</b> | <b>Complex 3</b> | <b>Complex 4</b> |
|------------------------|------------------|------------------|------------------|------------------|
| <b>Co-Cl1</b>          | 2.278            | 2.278            | 2.272            | 2.275            |
| <b>Co-Cl2</b>          | 2.277            | 2.277            | -                | -                |
| <b>Co-N1</b>           | 1.997            | 2.021            | 2.020            | 2.023            |
| <b>Co-N2</b>           | 1.984            | 1.983            | 2.009            | 2.010            |
| <b>Co-N3</b>           | 2.024            | 2.024            | 2.023            | 2.025            |
| <b>Co-N4</b>           | 1.997            | 1.996            | 2.026            | 2.026            |
| <b>Co-N5</b>           | -                | -                | 2.033            | 2.035            |
| <b>N1-Co-Cl1</b>       | 176.5            | 176.5            | 176.3            | 176.2            |
| <b>N2-Co-N4</b>        | 177.0            | 176.9            | 175.4            | 175.4            |
| <b>N3-Co-Cl2</b>       | 176.0            | 176.0            | -                | -                |
| <b>N3-Co-N5</b>        | -                | -                | 173.4            | 173.4            |
